# Supplementary material for: Co3Gd4 Cage as Magnetic Refrigerant and Co3Dy3 Cage Showing Slow Relaxation of Magnetisation
Source: MDPI journal article supplement (doi:10.3390/molecules27031130), 2022-02-08
Supplement: s1 [file s1]

## **Co<sub>3</sub>Gd<sub>4</sub> cage as magnetic refrigerant and Co<sub>3</sub>Dy<sub>3</sub> cage showing slow relaxation of magnetisation**

**Javeed Ahmad Sheikh\*, Himanshu Sekhar Jena and Sanjit Konar**

### **Experimental Section**

#### **X-ray Crystallography**

#### **Synthesis**

##### **[Co<sub>3</sub>Gd<sub>4</sub>(μ<sub>3</sub>-OH)<sub>2</sub>(CO<sub>3</sub>)(O<sub>2</sub>C<sup>t</sup>Bu)<sub>11</sub>(teaH)<sub>3</sub>]·5H<sub>2</sub>O (1)**

[Co<sub>2</sub>(μ-OH<sub>2</sub>)(O<sub>2</sub>C<sup>t</sup>Bu)<sub>4</sub>]·(HO<sub>2</sub>C<sup>t</sup>Bu)<sub>4</sub>, **Co<sub>2</sub>** (100mg, 0.1mmol) was dissolved in CH<sub>3</sub>CN (8mL) and triethanolamine, teaH<sub>3</sub> (22mg, 0.15mmol) was added to the solution while stirring followed by the addition of Gd(NO<sub>3</sub>)<sub>3</sub>·6H<sub>2</sub>O (45 mg, 0.1mmol) and final mixture was further stirred for ~12 hrs at room temperature. The solution was filtered and the filtrate was kept at 4<sup>0</sup>C for slow evaporation. Within 3-4 days purple block shaped single crystals suitable for X-ray analysis were formed. The crystals were collected by filtration, washed with cold CH<sub>3</sub>CN and dried in air. Yield, 43% based on **Co<sub>2</sub>**. Elemental analysis: Calcd.(found) for C<sub>74</sub>H<sub>136</sub>Co<sub>3</sub>Gd<sub>4</sub>N<sub>3</sub>O<sub>44</sub>: C, 34.48(34.51); H, 5.31(5.34); N, 1.63(1.67). Selected IR data (KBr pellet): 3404 (b), 2952 (s), 1607 (s), 1474 (s), 1412 (m), 1374 (w), 1217 (s), 1123.5 (w), 883 (w), 572 (b) cm<sup>-1</sup>.

##### **[Co<sub>3</sub>Dy<sub>3</sub>(μ<sub>3</sub>-OH)<sub>4</sub>(O<sub>2</sub>C<sup>t</sup>Bu)<sub>6</sub>(teaH)<sub>3</sub>](NO<sub>3</sub>)<sub>2</sub>·H<sub>2</sub>O (2)**

|          |          |
|----------|----------|
| <b>1</b> | <b>2</b> |
|----------|----------|

The same procedure as that of **1** was used for the synthesis of this compound except that Dy(NO<sub>3</sub>)<sub>3</sub>·6H<sub>2</sub>O (45 mg, 0.1mmol) was added instead of Gd(NO<sub>3</sub>)<sub>3</sub>·6H<sub>2</sub>O. Yield, 47% based on **Co<sub>2</sub>**. Elemental analysis: Calcd.(found) for C<sub>48</sub>H<sub>88</sub>Co<sub>3</sub>Dy<sub>3</sub>N<sub>5</sub>O<sub>35</sub>: C, 29.42(29.45); H, 4.52(4.54); N, 3.57(3.59). Selected IR data (KBr pellet): 3438.7 (b), 2961.7 (s), 2075.2 (b), 1560.3 (w), 1484 (s), 1410.5 (m), 1227.9 (s), 1103.5 (m), 923.9 (w), 558.7 (b) cm<sup>-1</sup>.

| Co site | BVS (Assigned oxidation state) | Co site | BVS (Assigned oxidation state) |
|---------|--------------------------------|---------|--------------------------------|
| Co1     | 2.86(3)                        | Co1     | 2.86(3)                        |
| Co2     | 2.83(3)                        | Co2     | 2.83(3)                        |
| Co3     | 2.88(3)                        | Co3     | 2.82(3)                        |

**Table S1.** BVS calculations for complexes **1** and **2**.

Table S2. Crystal Data and Structure Refinement for Complexes **1** and **2**

|                                                                             | <b>1</b>                                                                                        | <b>2</b>                                                                                       |
|-----------------------------------------------------------------------------|-------------------------------------------------------------------------------------------------|------------------------------------------------------------------------------------------------|
| Formula                                                                     | C <sub>74</sub> H <sub>136</sub> Co <sub>3</sub> Gd <sub>4</sub> N <sub>3</sub> O <sub>44</sub> | C <sub>48</sub> H <sub>88</sub> Co <sub>3</sub> Dy <sub>3</sub> N <sub>5</sub> O <sub>35</sub> |
| Formula weight                                                              | 2574.05                                                                                         | 1951.50                                                                                        |
| T (K)                                                                       | 110(2)                                                                                          | 110(2)                                                                                         |
| Wavelength (Å)                                                              | 0.71073                                                                                         | 0.71073                                                                                        |
| Space group                                                                 | <i>P</i> -1                                                                                     | <i>P</i> 21/ <i>c</i>                                                                          |
| Crystal system                                                              | Triclinic                                                                                       | Monoclinic                                                                                     |
| <i>a</i> /Å                                                                 | 15.552(5)                                                                                       | 30.554(17)                                                                                     |
| <i>b</i> /Å                                                                 | 16.373(6)                                                                                       | 19.234(10)                                                                                     |
| <i>c</i> /Å                                                                 | 25.100(9)                                                                                       | 30.327(17)                                                                                     |
| $\alpha$ /deg                                                               | 77.745(2)                                                                                       | 90.00                                                                                          |
| $\beta$ /deg                                                                | 89.127(2)                                                                                       | 115.544(2)                                                                                     |
| $\gamma$ /deg                                                               | 65.270(2)                                                                                       | 90.00                                                                                          |
| <i>V</i> /Å <sup>3</sup>                                                    | 5653(3)                                                                                         | 16080(4)                                                                                       |
| <i>Z</i>                                                                    | 2                                                                                               | 4                                                                                              |
| <i>D</i> <sub>calcd</sub> (g cm <sup>-3</sup> )                             | 1.512                                                                                           | 1.612                                                                                          |
| $\mu$ (mm <sup>-1</sup> )                                                   | 2.818                                                                                           | 3.435                                                                                          |
| <i>F</i> (000)                                                              | 2576                                                                                            | 7728                                                                                           |
| $\theta_{\min}$ , $\theta_{\max}$ (deg)                                     | 2.67, 25.00                                                                                     | 2.19, 25.00                                                                                    |
| Reflection collected                                                        | 19227                                                                                           | 28319                                                                                          |
| unique reflections                                                          | 19911                                                                                           | 26869                                                                                          |
| <i>R</i> <sub>1</sub> , <i>wR</i> <sub>2</sub> ( <i>I</i> ≥ 2σ( <i>I</i> )) | 0.0433, 0.1273                                                                                  | 0.0760, 0.2181                                                                                 |
| Goodness of fit (GOF) on <i>F</i> <sup>2</sup>                              | 0.902                                                                                           | 0.927                                                                                          |

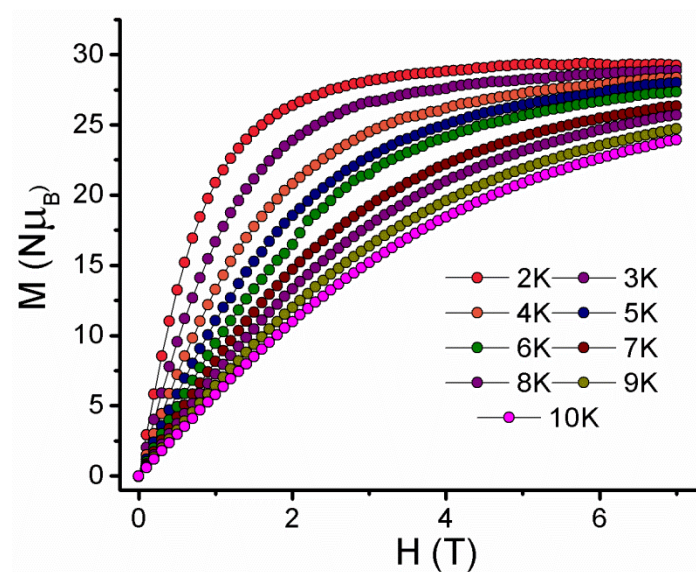

**Figure S1** Field-dependencies of isothermal normalized magnetizations for complex **1** collected for temperatures ranging from 2-10 K

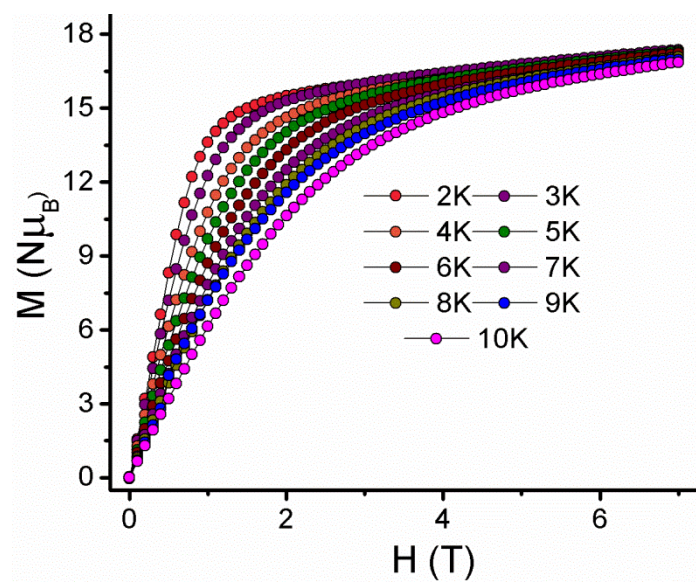

**Figure S2** Field-dependencies of isothermal normalized magnetizations for complex **2** collected for temperatures ranging from 2-10 K.

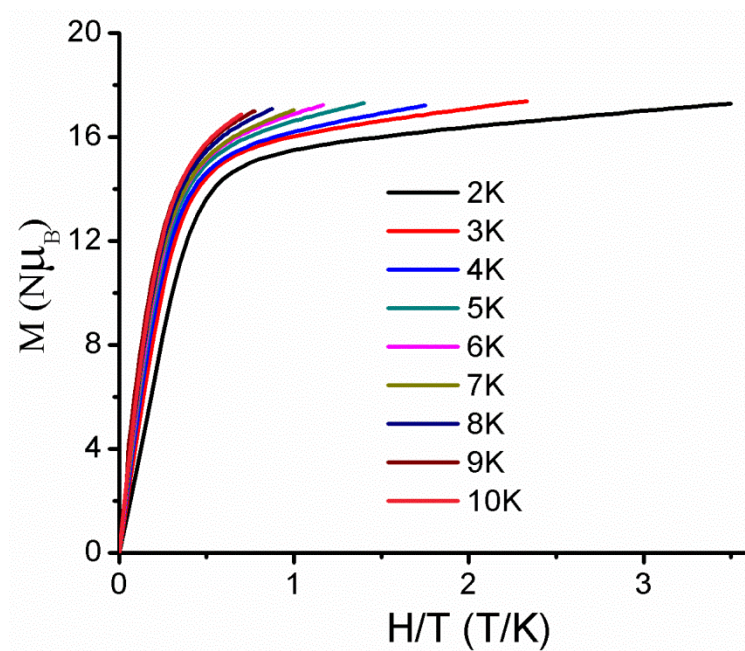

**Figure S3**  $M/N\mu_B$  vs  $H/T$  plots for complex **2** at 2-10 K.

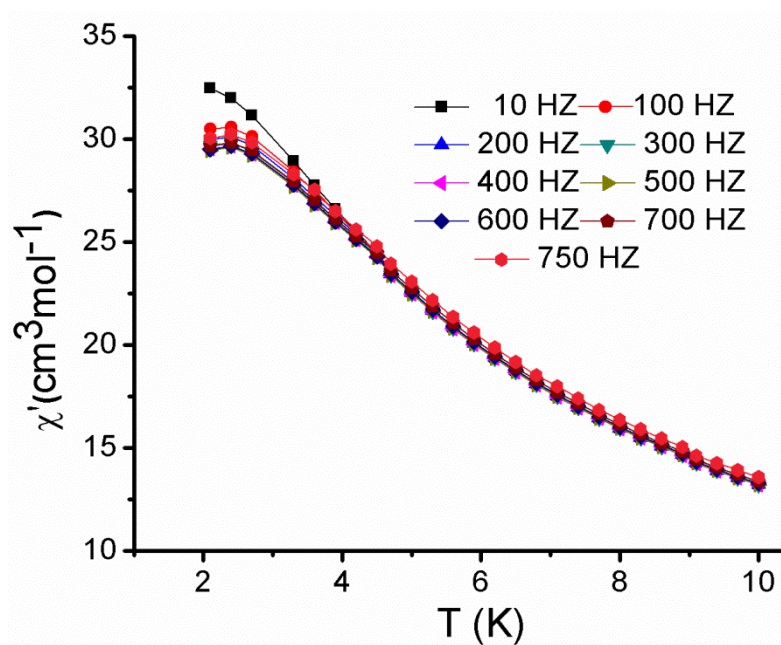

**Figure S4** Temperature dependence of the in-phase ( $\chi'$ ) ac susceptibility for complex **2** under zero dc field.

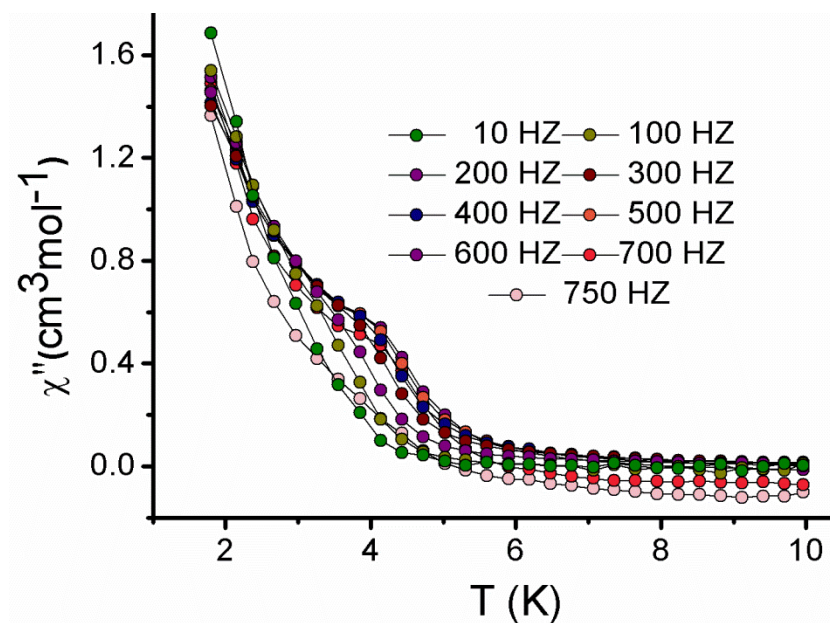

**Figure S5** Temperature dependence of the out of phase ( $\chi''$ ) ac susceptibility for complex **2** under zero dc field.

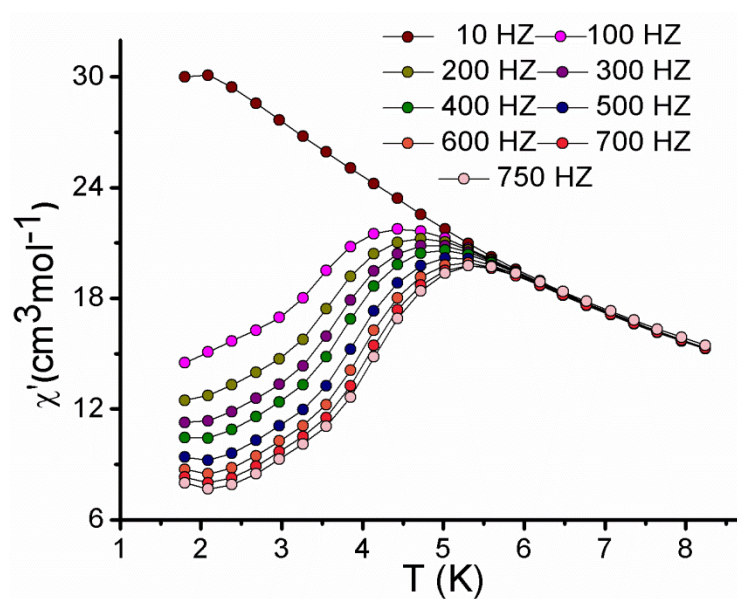

**Figure S6** Temperature dependence of the in-phase ( $\chi'$ ) ac susceptibility for complex **2** under 2000 Oe dc field.

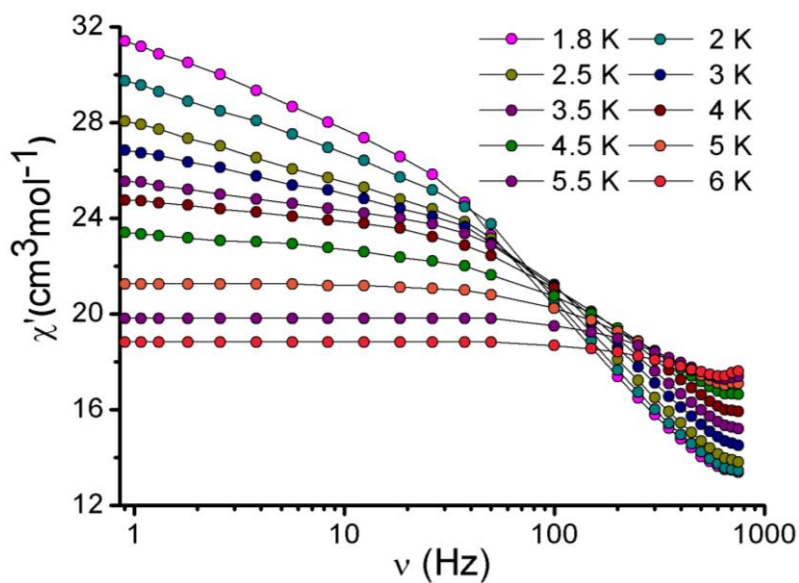

**Figure S7** Frequency dependence of the in-phase ( $\chi'$ ) ac susceptibility for complex **2** under 2000 Oe dc field.

#### References:

1. *SAINT*, Program for Reduction of Area Detector Data, **V6. 63**; BRUKER AXS Inc. Madison, WI.
2. Sheldrick, G. *SADABS*, Program for Absorption Correction of Area Detector Frames; BRUKER AXS Inc.: Madison, WI.
3. Sheldrick, G. *SHELXL-97*, Program for Crystal Structure Refinement; University of Gottingen: Gottingen, Germany, 1997.
4. PLATON: A. L. Spek, *J. Appl. Crystallogr.* 2003, **36**, 7.
5. A. L. Spek, PLATON. Molecular Geometry Program. *J. Appl. Crystallogr.* 2003, **45**, 1.
6. O. Kahn, *Molecular Magnetism*; Wiley-VCH: New York, 1993.
